# Supplementary material for: A theoretical study of the L3 pre-edge XAS in Cu(ii) complexes
Source: Royal Society of Chemistry journal article supplement (doi:10.1039/c4cp02441a), 2014-01-01
Supplement: c4cp02441a1.pdf [file c4cp02441a1.pdf]

## A theoretical study of the L<sub>3</sub> pre-edge XAS in Cu(II) complexes

G. Mangione,<sup>a</sup> M. Sambì,<sup>a</sup> M. V. Nardi<sup>b,c</sup> and M. Casarin<sup>\*,a</sup>

### Supporting Information

#### Computational Details

Numerical experiments have been run by employing the latest version of the Amsterdam Density Functional (ADF) package.<sup>1</sup> SO-ZORA TDDFT-TDA calculations have been carried out by using all-electron QZ4P ZORA basis sets for all the atoms.<sup>2</sup> The adiabatic local density approximation has been employed to approximate the XC kernel,<sup>3,4</sup> while for the XC potential applied in the self-consistent field calculations, the LB94 approximate functional with the ground state electronic configuration has been adopted.<sup>5</sup> Scaled ZORA orbital energies<sup>6</sup> instead of the ZORA orbital energies in the TDDFT equations have been throughout employed to improve deep core excitation energies.

SO-ZORA TDDFT-TDA calculations pertaining to **I** have been run by assuming the same geometrical parameters adopted by Gewirth *et al.*,<sup>7</sup> while the plastocyanin blue copper active site has been modeled by using the same cluster ([Cu(S(CH<sub>3</sub>)<sub>2</sub>)(SCH<sub>3</sub>)(NH<sub>3</sub>)<sub>2</sub>]<sup>+</sup>) proposed by Solomon and coworkers in ref. 8. Two distinct sets of calculations have been run on it. In the former set, the SO-ZORA TDDFT-TDA Cu 2p *f* distribution has been obtained by using Cartesian coordinates reported in Table I of ref. 8 without any optimization. Differently from that, the *f* distribution pertaining to the latter set has been attained for optimized coordinates evaluated by running non-relativistic spin-unrestricted calculations with generalized gradient corrections self-consistently included through the Becke-Perdew formula,<sup>9</sup> by adopting a TZP Slater-type basis set for all the atoms and by maintaining frozen the (1s-2p)<sup>Cu</sup>, (1s-2p)<sup>S</sup>, 1s<sup>C</sup> and 1s<sup>N</sup> cores throughout the calculations. Both sets of numerical experiments have been run by assuming a C<sub>s</sub> symmetry. Non-Optimized- and Optimized-Structures (NOS and OS, respectively) are quite different. In particular, the OS Cu(II) ion lies at 1.114 Å above the plane defined by the N and S<sub>cys</sub> species (the NOS Cu(II) ion is almost coplanar with N and S<sub>cys</sub> atoms, lying 0.349 Å above the corresponding plane); moreover, the long Cu-S<sub>met</sub> bond shortens from 2.903 to 2.547 Å, while the S<sub>cys</sub>-Cu-S<sub>met</sub> (N-Cu-N) angle widens from 110° (96°) to 124° (101°) on passing from NOS to OS.

As far as the *f* distribution of **II** is concerned, it has been evaluated by using the geometrical parameters optimized in ref. 10.

The energy difference between Cu  $2p_{3/2}$  and  $2p_{1/2}$  spinors should be large enough ( $\sim 20$  eV)<sup>10</sup> to avoid, in transitions starting from them, any coupling with each other; nevertheless, the whole Cu  $2p_{3/2}/2p_{1/2}$  set has been considered as initial state. No coupling has been revealed.

- 1 Amsterdam Density Functional (ADF) version 2013.01. <http://www.scm.com>.
- 2 E. van Lenthe and E. J. Baerends, *J. Comput. Chem.* 2003, **24**, 1142.
- 3 (a) G. Fronzoni, M. Stener, P. Decleva, F. Wang, T. Ziegler, E. van Lenthe and E. J. Baerends, *Chem. Phys. Lett.* 2005, **416**, 56; (b) M. Casarin, P. Finetti, A. Vittadini, F. Wang and T. Ziegler, *J. Phys. Chem. A* 2007, **111**, 5270.
- 4 E. K. U. Gross and W. Kohn, *Adv. Quantum Chem.* 1990, **21**, 255.
- 5 R. van Leeuwen and E. J. Baerends, *Phys. Rev. A* 1994, **49**, 2421.
- 6 J. H. van Lenthe, S. Faas and J. G. Snijders, *Chem. Phys. Lett.* 2000, **328**, 107.
- 7 A. A. Gewirth, S. L. Cohen, H. J. Schugar and E. I. Solomon, *Inorg. Chem.* 1987, **26**, 1133.
- 8 K. W. Penfield, A. A. Gewirth and E. I. Solomon, *J. Am. Chem. Soc.* 1985, **107**, 4519.
- 9 (a) A. D. Becke, *Phys. Rev. A* 1988, **38**, 3098; (b) J. P. Perdew, *Phys. Rev. B* 1986, **33**, 8822.
- 10 M. V. Nardi, F. Detto, L. Aversa, R. Verucchi, G. Salvati, S. Iannotta and M. Casarin, *Phys. Chem. Chem. Phys.* 2013, **15**, 12864-12881.

### Cartesian coordinates (Å) of III<sup>OS</sup>

| Element | x         | y         | z         |
|---------|-----------|-----------|-----------|
| Cu      | 0.034133  | -0.243602 | 0.000000  |
| S       | -0.380615 | -2.756510 | 0.000000  |
| S       | 2.013025  | 0.666055  | 0.000000  |
| C       | 3.326612  | -0.607373 | 0.000000  |
| H       | 2.926252  | -1.624599 | 0.000000  |
| H       | 3.952073  | -0.440640 | 0.887399  |
| N       | -1.250947 | 0.168086  | 1.636259  |
| H       | -0.754157 | 0.027118  | 2.520582  |
| H       | -1.566243 | 1.142648  | 1.648226  |
| H       | -2.094872 | -0.411186 | 1.681437  |
| C       | 0.414827  | -3.621964 | 1.404784  |
| H       | -0.017191 | -3.216197 | 2.326835  |
| H       | 0.179195  | -4.691098 | 1.343337  |
| H       | 1.499399  | -3.466577 | 1.405506  |
| H       | 3.952073  | -0.440640 | -0.887399 |
| N       | -1.250947 | 0.168086  | -1.636259 |
| H       | -0.754157 | 0.027118  | -2.520582 |
| H       | -1.566243 | 1.142648  | -1.648226 |
| H       | -2.094872 | -0.411186 | -1.681437 |
| C       | 0.414827  | -3.621964 | -1.404784 |
| H       | -0.017191 | -3.216197 | -2.326835 |
| H       | 0.179195  | -4.691098 | -1.343337 |
| H       | 1.499399  | -3.466577 | -1.405506 |
